# Supplementary material for: Potentiality of Sustainable Maize Production under Rainfed Conditions in the Tropics by Triggering Agro-Physio-Biochemical Traits Ascertained from a Greenhouse
Source: MDPI journal article supplement (doi:10.3390/plants12244192), 2023-12-18
Supplement: s1 [file s1]

# Supplementary Materials

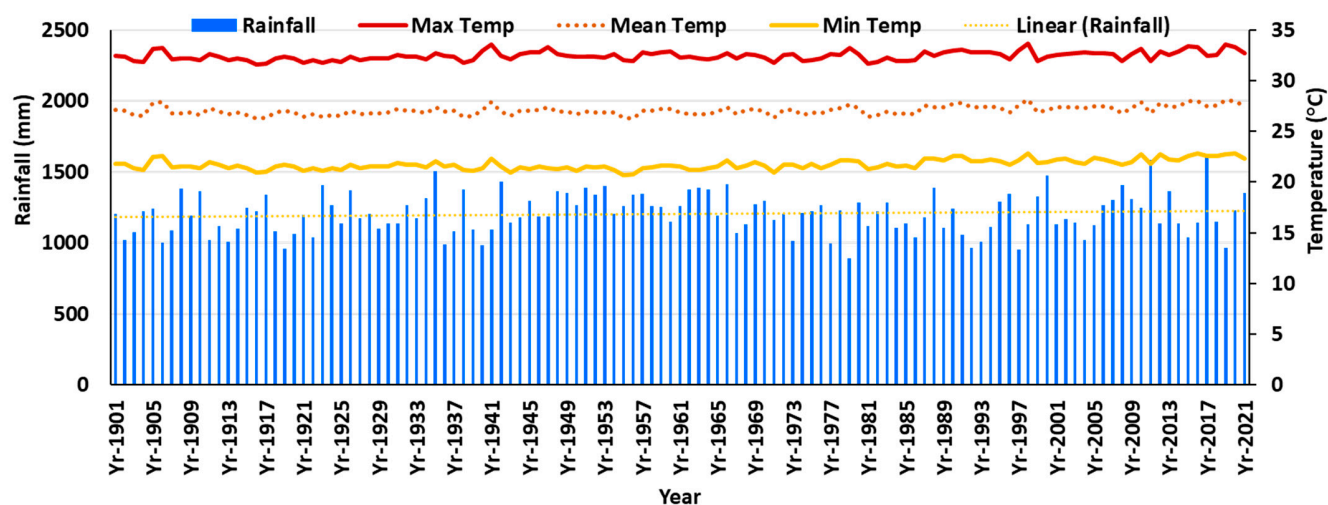

**Figure S1.** Yearly long-term climate during 1901-2021 at experimental location, Pakchong, Nakhon Ratchasima, Thailand. Yearly rainfall (total) in mm, and temperature (maximum, mean & minimum) in °C.

**Table S1.** Analysis of variance for the effect of water levels, genotypes, and their interaction on different agro-physio-biochemical traits of maize in the greenhouse.

| Source of variance | df | Mean square |           |          |                                            |                                            |                                            |                               |                              |                               |                               |                               |                                                  |                                                  |                                                  |                                               |                                               |                                               |          |          |                               |                              |
|--------------------|----|-------------|-----------|----------|--------------------------------------------|--------------------------------------------|--------------------------------------------|-------------------------------|------------------------------|-------------------------------|-------------------------------|-------------------------------|--------------------------------------------------|--------------------------------------------------|--------------------------------------------------|-----------------------------------------------|-----------------------------------------------|-----------------------------------------------|----------|----------|-------------------------------|------------------------------|
|                    |    | RL3 (cm)    | SBD3 (cm) | PH3 (cm) | LA1 (cm <sup>2</sup> plant <sup>-1</sup> ) | LA2 (cm <sup>2</sup> plant <sup>-1</sup> ) | LA3 (cm <sup>2</sup> plant <sup>-1</sup> ) | APB3 (g plant <sup>-1</sup> ) | RW3 (g plant <sup>-1</sup> ) | TPB1 (g plant <sup>-1</sup> ) | TPB2 (g plant <sup>-1</sup> ) | TPB3 (g plant <sup>-1</sup> ) | RGR-T1 (mg plant <sup>-1</sup> d <sup>-1</sup> ) | RGR-T2 (mg plant <sup>-1</sup> d <sup>-1</sup> ) | RGR-T3 (mg plant <sup>-1</sup> d <sup>-1</sup> ) | NAR-T1 (mg cm <sup>-2</sup> d <sup>-1</sup> ) | NAR-T2 (mg cm <sup>-2</sup> d <sup>-1</sup> ) | NAR-T3 (mg cm <sup>-2</sup> d <sup>-1</sup> ) | SPAD3    | RWC3 (%) | Pr3 (μmol g <sup>-1</sup> FW) | TSS3 (mg g <sup>-1</sup> FW) |
| Replication        | 3  | 11.31       | 3.41      | 17.00    | 25.99                                      | 49.57                                      | 216.3                                      | 1.65                          | 0.23                         | 0.52                          | 1.67                          | 3.13                          | 47.84                                            | 13.43                                            | 28.42                                            | 1.28                                          | 0.28                                          | 0.47                                          | 19.05    | 86.97    | 0.01                          | 0.02                         |
| Water level (W)    | 2  | 18.63**     | 29.54**   | 446.44** | 2019.27**                                  | 1650.45**                                  | 10687.4**                                  | 152.04**                      | 9.18**                       | 24.78**                       | 105.21**                      | 235.20**                      | 255.69**                                         | 198.54**                                         | 311.11**                                         | 10.54**                                       | 8.85**                                        | 3.58**                                        | 106.50** | 827.58** | 0.51**                        | 0.54**                       |
| Genotype (G)       | 2  | 51.84**     | 26.52**   | 70.64**  | 317.17**                                   | 950.41**                                   | 1622.6**                                   | 16.96**                       | 5.62**                       | 1.30**                        | 10.77**                       | 39.26**                       | 492.13**                                         | 279.91**                                         | 577.77**                                         | 1.92**                                        | 3.92**                                        | 4.13**                                        | 12.32*   | 511.23** | 0.06**                        | 0.17**                       |
| W×G                | 4  | 1.72ns      | 6.01**    | 13.79**  | 67.37**                                    | 73.91**                                    | 217.2**                                    | 1.94**                        | 0.09*                        | 0.73**                        | 0.61ns                        | 1.96*                         | 33.59**                                          | 120.69**                                         | 111.11**                                         | 3.34**                                        | 5.40**                                        | 2.19**                                        | 3.37ns   | 95.10**  | 0.07**                        | 0.06**                       |

| Error | Source of variance | df   | Mean square |           |          |                                            |                                            |                                            |                               |                              |                               |                               |                               |                                                  |                                                  |                                                  |                                               |                                               |                                               |       |          |
|-------|--------------------|------|-------------|-----------|----------|--------------------------------------------|--------------------------------------------|--------------------------------------------|-------------------------------|------------------------------|-------------------------------|-------------------------------|-------------------------------|--------------------------------------------------|--------------------------------------------------|--------------------------------------------------|-----------------------------------------------|-----------------------------------------------|-----------------------------------------------|-------|----------|
|       |                    |      | RL3 (cm)    | SBD3 (cm) | PH3 (cm) | LA1 (cm <sup>2</sup> plant <sup>-1</sup> ) | LA2 (cm <sup>2</sup> plant <sup>-1</sup> ) | LA3 (cm <sup>2</sup> plant <sup>-1</sup> ) | APB3 (g plant <sup>-1</sup> ) | RW3 (g plant <sup>-1</sup> ) | TPB1 (g plant <sup>-1</sup> ) | TPB2 (g plant <sup>-1</sup> ) | TPB3 (g plant <sup>-1</sup> ) | RGR-T1 (mg plant <sup>-1</sup> d <sup>-1</sup> ) | RGR-T2 (mg plant <sup>-1</sup> d <sup>-1</sup> ) | RGR-T3 (mg plant <sup>-1</sup> d <sup>-1</sup> ) | NAR-T1 (mg cm <sup>-2</sup> d <sup>-1</sup> ) | NAR-T2 (mg cm <sup>-2</sup> d <sup>-1</sup> ) | NAR-T3 (mg cm <sup>-2</sup> d <sup>-1</sup> ) | SPAD3 | RWC3 (%) |
| 24    | 1.73               | 0.50 | 2.47        | 4.09      | 7.54     | 32.8                                       | 0.25                                       | 0.03                                       | 0.08                          | 0.26                         | 0.48                          | 7.23                          | 1.92                          | 4.05                                             | 0.19                                             | 0.04                                             | 0.06                                          | 2.75                                          | 12.46                                         | 0.002 | 0.03**   |

**Table S2.** Analysis of variance for the effect of ethephon application tactics on different agronomic traits of maize under rainfed conditions at field level.

V6: vegetative 6 leaves stage; V10: vegetative 10 leaves stage; VT: vegetative tasseling stage; R3: reproductive phase-3 of maize plant; PM: physiological maturity stage; PH-PM: plant height at PM; EH-PM: ear height at PM; EH:PH: ear height and plant height ratio; SBD-VT: stem base diameter at VT; LA-V6, LA-V10, LA-VT, and LA-R3: leaf area at V6, V10, VT, and R3, respectively; APB-V6, APB-V10, APB-VT, and APB-R3: above ground plant biomass at V6, V10, VT, and R3, respectively; KNP: kernel number per plant; 100-KW: 100-kernel weight; KY: kernel yield.

**Table S3.** Analysis of variance for the effect of ethephon application tactics on different agro-physio-biochemical traits of maize under rainfed conditions at field level.

| Source of variance | df | Mean square                 |           |                                                        |                                                        |                                                       |                                                     |                                                     |                                                    |                   |                |                                                  |            |         |              |           |                                      |                                |                                 |
|--------------------|----|-----------------------------|-----------|--------------------------------------------------------|--------------------------------------------------------|-------------------------------------------------------|-----------------------------------------------------|-----------------------------------------------------|----------------------------------------------------|-------------------|----------------|--------------------------------------------------|------------|---------|--------------|-----------|--------------------------------------|--------------------------------|---------------------------------|
|                    |    | SLW-VT (g m <sup>-2</sup> ) | LP-PM (%) | RGRA-V6V10 (mg plant <sup>-1</sup> day <sup>-1</sup> ) | RGRA-V10VT (mg plant <sup>-1</sup> day <sup>-1</sup> ) | RGRA-V6R3 (mg plant <sup>-1</sup> day <sup>-1</sup> ) | NARA-V6V10 (mg cm <sup>-2</sup> day <sup>-1</sup> ) | NARA-V10VT (mg cm <sup>-2</sup> day <sup>-1</sup> ) | NARA-V6R3 (mg cm <sup>-2</sup> day <sup>-1</sup> ) | Energy efficiency | AGDD (°C days) | HUE (kg ha <sup>-1</sup> °C days <sup>-1</sup> ) | RWC-VT (%) | SPAD-VT | RSR-VTR3 (%) | EL-VT (%) | C absorption (t C ha <sup>-1</sup> ) | TSS-VT (mg g <sup>-1</sup> FW) | Pr-VT (μmol g <sup>-1</sup> FW) |
| Replication        | 3  | 6.38                        | 0.11      | 0.82                                                   | 2.38                                                   | 0.01                                                  | 0.001                                               | 0.001                                               | 0.002                                              | 0.01              | 8140           | 0.02                                             | 21.52      | 4.67    | 0.01         | 0.07      | 0.08                                 | 6373                           | 1.35                            |
| Ethephon (E)       | 6  | 69.51*                      | 83.32*    | 1.94n                                                  | 2.56n                                                  | 1.21*                                                 | 0.001n                                              | 0.006*                                              | 0.013*                                             | 0.08*             | 5837n          | 0.19*                                            | 23.67n     | 5.16n   | 0.05*        | 0.53*     | 1.17*                                | 60365*                         | 38.92*                          |
|                    |    | *                           | *         | s                                                      | s                                                      | *                                                     | s                                                   | *                                                   | *                                                  | *                 | s              | *                                                | s          | s       | *            | *         | *                                    | *                              | *                               |
| Error              | 18 | 6.86                        | 0.10      | 0.82                                                   | 1.49                                                   | 0.01                                                  | 0.000                                               | 0.001                                               | 0.002                                              | 0.01              | 8056           | 0.02                                             | 22.27      | 4.75    | 0.01         | 0.07      | 0.08                                 | 6853                           | 1.52                            |

V6: vegetative 6 leaves stage; V10: vegetative 10 leaves stage; VT: vegetative tasseling stage; R3: reproductive phase-3 of maize plant; PM: physiological maturity stage; SLW-VT: specific leaf weight at VT; LP-PM: lodging percentage at PM; RGRA-V6V10, RGRA-V10VT, and RGRA-V6R3: relative growth rate based on above ground plant biomass during V6 to V10, V10 to VT, and V6 to R3, respectively; NARA-V6V10, NARA-V10VT, and NARA-V6R3: net assimilation rate based on above ground plant biomass during V6 to V10, V10 to VT, and V6 to R3, respectively; AGDD: accumulated growing degree days; HUE: heat use efficiency; RWC-VT: relative water content at VT; SPAD-VT: SPAD value of leaf greenness at VT; RSR-VTR3: relative senescence rate during VT to R3; EL-VT: electrolyte leakage at VT; C: carbon; TSS-VT: total soluble sugar at VT; Pr-VT: proline content at VT.
